# Supplementary material for: Elucidating Carfilzomib’s Induced Cardiotoxicity in an In Vivo Model of Aging: Prophylactic Potential of Metformin
Source: MDPI journal article supplement (doi:10.3390/ijms222010956), 2021-10-11
Supplement: s1 [file s1]

**Elucidating Carfilzomib's induced cardiotoxicity in an in vivo model of aging: prophylactic potential of metformin.**

Panagiotis Efentakis<sup>1</sup>, Garyfalia Psarrakou<sup>1†</sup>, Aimilia Varela<sup>2</sup>, Eleni Dimitra Papanagnou<sup>3</sup>, Michail Chatzistefanou<sup>1</sup>, Panagiota-Efstathia Nikolaou<sup>1</sup>, Costantinos H. Davos<sup>2</sup>, Maria Gavriatopoulou<sup>4</sup>, Ioannis P. Trougakov<sup>3</sup>, Meletios Athanasios Dimopoulos<sup>4</sup>, Ioanna Andreadou<sup>1\*#</sup>, Evangelos Terpos<sup>4\*</sup>.

<sup>1.</sup> *Laboratory of Pharmacology, Faculty of Pharmacy, National and Kapodistrian University of Athens, Athens, Greece;*

<sup>2.</sup> *Cardiovascular Research Laboratory, Clinical, Experimental Surgery & Translational Research Center, Biomedical Research Foundation Academy of Athens, Athens, Greece;*

<sup>3.</sup> *Department of Cell Biology & Biophysics Faculty of Biology, National and Kapodistrian University of Athens, Athens, Greece*

<sup>4.</sup> *Department of Clinical Therapeutics, School of Medicine, National and Kapodistrian University of Athens, Athens, Greece.*

*\* Equally Contributes Senior Authors*

*† In memory of our late colleague Garyfalia Psarrakou*

**# Correspondence:** Ioanna Andreadou, Ph.D, Faculty of Pharmacy, Panepistimiopolis, Zografou, Athens 15771, Greece; tel: +30 210 7274827; fax: +30 210 7274747; e-mail: jandread@pharm.uoa.gr

## Supplemental Tables

**Table S1: Echocardiographic analysis of aged mice in the two-dose protocol at baseline**

| Table S1           | Control           | Cfz               | Met               | Cfz+Met           |
|--------------------|-------------------|-------------------|-------------------|-------------------|
| <b>P2_Day 0</b>    | <b>n=7</b>        | <b>n=6</b>        | <b>n=5</b>        | <b>n=6</b>        |
| HR                 | 524.28±7.19       | 524.33±17.16      | 488.00±16.24      | 525.33±10.66      |
| LVEDD(mm)          | 4.06±0.12         | 4.10±0.05         | 3.99±0.11         | 4.03±0.21         |
| LVESD(mm)          | 2.63±0.12         | 2.59±0.09         | 2.57±0.11         | 2.55±0.14         |
| PWTd (mm)          | 0.77±0.01         | 0.78±0.01         | 0.76±0.01         | 0.78±0.01         |
| FS%                | 35.23±1.38        | 36.86±1.68        | 35.62±1.77        | 36.86±1.45        |
| <b>CO (mL/min)</b> | <b>24.14±1.16</b> | <b>26.10±1.38</b> | <b>22.46±2.07</b> | <b>25.83±3.58</b> |
| r/h                | 2.65±0.11         | 2.63±0.05         | 2.61±0.11         | 2.56±0.12         |

Baseline values of aged mice in the two-dose protocol. Values are presented as mean ± SEM. HR: Heart Rate; LVEDD: Left Ventricular End Diastolic Diameter (mm); LVESD: Left Ventricular End Systolic Diameter (mm); PWTd: Posterior Wall Thickness diastole (mm); FS%: Fractional Shortening %; r/h: ratio of LV radius to PWT-posterior wall thickness.

**Table S2: Echocardiographic analysis of aged mice in the two-dose protocol at endpoint**

| Table S2           | Control           | Cfz               | Met               | Cfz+Met           |
|--------------------|-------------------|-------------------|-------------------|-------------------|
| <b>Day 2</b>       | <b>n=7</b>        | <b>n=6</b>        | <b>n=5</b>        | <b>n=6</b>        |
| HR                 | 554.42±16.75      | 533.33±27.20      | 507.60±16.88      | 507.16±11.35      |
| LVEDD (mm)         | 3.72±0.13         | 4.06±0.11         | 4.21±0.08         | 3.86±0.17         |
| LVESD (mm)         | 2.43±0.11         | 2.84±0.17         | 2.82±0.07         | 2.54±0.19         |
| PWTd (mm)          | 0.75±0.01         | 0.71±0.01         | 0.74±0.01         | 0.77±0.01         |
| FS%                | 34.84±1.11        | 30.40±2.42        | 33.04±0.45        | 34.60±2.62        |
| <b>CO (mL/min)</b> | <b>21.00±0.92</b> | <b>22.21±1.59</b> | <b>24.99±1.23</b> | <b>20.76±1.73</b> |
| r/h                | 2.48±0.09         | 2.84±0.10*†       | 2.85±0.08*†       | 2.47±0.11         |

Endpoint values of aged mice in the two-dose protocol. Values are presented as mean ± SEM. HR: Heart Rate; LVEDD: Left Ventricular End Diastolic Diameter (mm); LVESD: Left Ventricular End Systolic Diameter (mm); PWTd: Posterior Wall Thickness diastole (mm); FS%: Fractional Shortening %; r/h: ratio of LV radius to PWT-posterior wall thickness. One-Way ANOVA, Bonferroni post-hoc analysis, \*P<0.05 vs control, †P<0.05 vs Cfz+Met

**Table S3: Student's T-Test analysis of Cfz Baseline and Endpoint values in the two-dose protocol that were statistically significantly affected.**

|                             |                |
|-----------------------------|----------------|
| <b>Table S3</b>             |                |
| <b>Baseline vs Endpoint</b> | <b>p value</b> |
| PWTd (mm)                   | 0.0047         |
| FS%                         | 0.0274         |

Student's T-Test analysis of Cfz Baseline and Endpoint values that were statistically significantly affected. PWTd: Posterior Wall Thickness diastole (mm); FS%: Fractional Shortening %. Student's T-Test, paired, two-tailed.

**Table S4: Echocardiographic analysis of aged mice in the four-dose protocol at baseline**

| <b>Table S4</b>    | <b>Control</b> | <b>Cfz</b>   | <b>Met</b>   | <b>Cfz+Met</b> |
|--------------------|----------------|--------------|--------------|----------------|
| <b>P6_ Day 0</b>   | <b>n=5</b>     | <b>n=6</b>   | <b>n=8</b>   | <b>n=6</b>     |
| <b>HR</b>          | 541.00±4.47    | 528.16±19.88 | 563.75±10.16 | 542.33±15.88   |
| <b>LVEDD (mm)</b>  | 3.90±0.06      | 4.00±0.18    | 3.77±0.13    | 3.84±0.11      |
| <b>LVESD (mm)</b>  | 2.41±0.07      | 2.55±0.14    | 2.42±0.11    | 2.53±0.06      |
| <b>PWTd (mm)</b>   | 0.76±0.01      | 0.75±0.01    | 0.75±0.01    | 0.76±0.03      |
| <b>FS%</b>         | 38.00±1.82     | 36.20±1.97   | 35.86±1.00   | 33.87±1.21     |
| <b>CO (mL/min)</b> | 24.57±1.61     | 24.08±2.72   | 22.65±1.43   | 21.94±1.44     |
| <b>r/h</b>         | 2.56±0.08      | 2.67±0.13    | 2.50±0.08    | 2.51±0.10      |

Baseline values of aged mice in the four-dose protocol. Values are presented as mean ± SEM. HR: Heart Rate; LVEDD: Left Ventricular End Diastolic Diameter (mm); LVESD: Left Ventricular End Systolic Diameter (mm); PWTd: Posterior Wall Thickness diastole (mm); FS%: Fractional Shortening %; r/h: ratio of LV radius to PWT-posterior wall thickness.

**Table S5: Echocardiographic analysis of aged mice in the four-dose protocol at endpoint**

| Table S5    | Control      | Cfz          | Met          | Cfz+Met      |
|-------------|--------------|--------------|--------------|--------------|
| P6_Day 6    | n=5          | n=6          | n=8          | n=5          |
| HR          | 527.40±38.15 | 506.00±20.01 | 561.00±24.18 | 536.77±11.82 |
| LVEDD (mm)  | 3.78±0.05    | 3.74±0.14    | 3.68±0.10    | 3.71±0.18    |
| LVEDS (mm)  | 2.40±0.11    | 2.59±0.15    | 2.37±0.09    | 2.42±0.13    |
| PWTd (mm)   | 0.75±0.01    | 0.74±0.01†   | 0.74±0.01†   | 0.77±0.01    |
| FS%         | 36.63±2.64   | 30.94±2.14*‡ | 35.67±0.93   | 34.77±1.13   |
| CO (mL/min) | 21.64±1.99   | 17.94±1.87   | 21.09±1.05   | 20.47±2.12   |
| r/h         | 2.49±0.03    | 2.54±0.11    | 2.50±0.06    | 2.40±0.12    |

Endpoint values of aged mice in the four-dose protocol. Values are presented as mean ± SEM. HR: Heart Rate; LVEDD: Left Ventricular End Diastolic Diameter (mm); LVEDS: Left Ventricular End Systolic Diameter (mm); PWTd: Posterior Wall Thickness diastole (mm); FS%: Fractional Shortening %; r/h: ratio of LV radius to PWT-posterior wall thickness. One-Way ANOVA, Bonferroni post-hoc analysis, \*P<0.05 vs Control, †P<0.05 vs Cfz+Met, ‡P<0.05 vs Met

**Table S6: Student's T-Test analysis of Cfz Baseline and Endpoint values in the four-dose protocol that were statistically significantly affected.**

| Table S6             |         |
|----------------------|---------|
| Baseline vs Endpoint | p value |
| FS%                  | 0.0010  |

Student's T-Test analysis of Cfz Baseline and Endpoint values that were statistically significantly affected. FS%: Fractional Shortening %. Student's T-Test, paired, two-tailed.

**A**

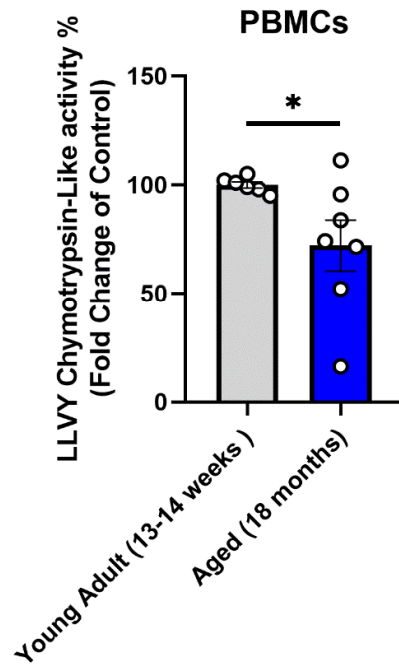

**B**

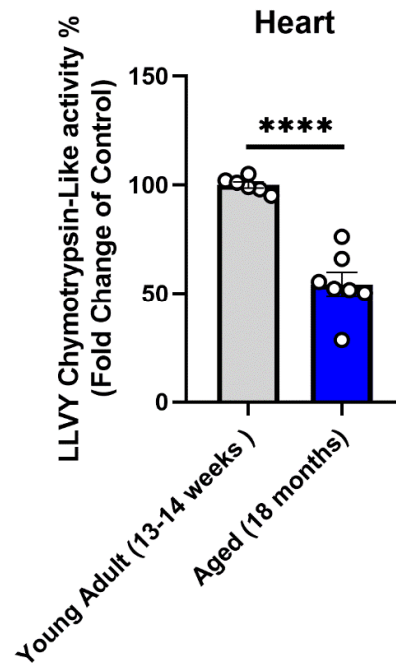

**Figure S1. Aged mice present reduced LLVY proteasome activity compared to young adult mice both in heart and PBMCs.** Graphs of LLVY Chymotrypsin-Like activity % in the A. PBMCs and B. Heart expressed as Fold change of young adult (13 weeks of age) C57BL/6J mice. All data are presented as mean  $\pm$  SEM. Two Tailed unpaired T-Test; \* $P < 0.05$ , \*\*\*\* $P < 0.001$ . PBMCs, peripheral blood mononuclear cells

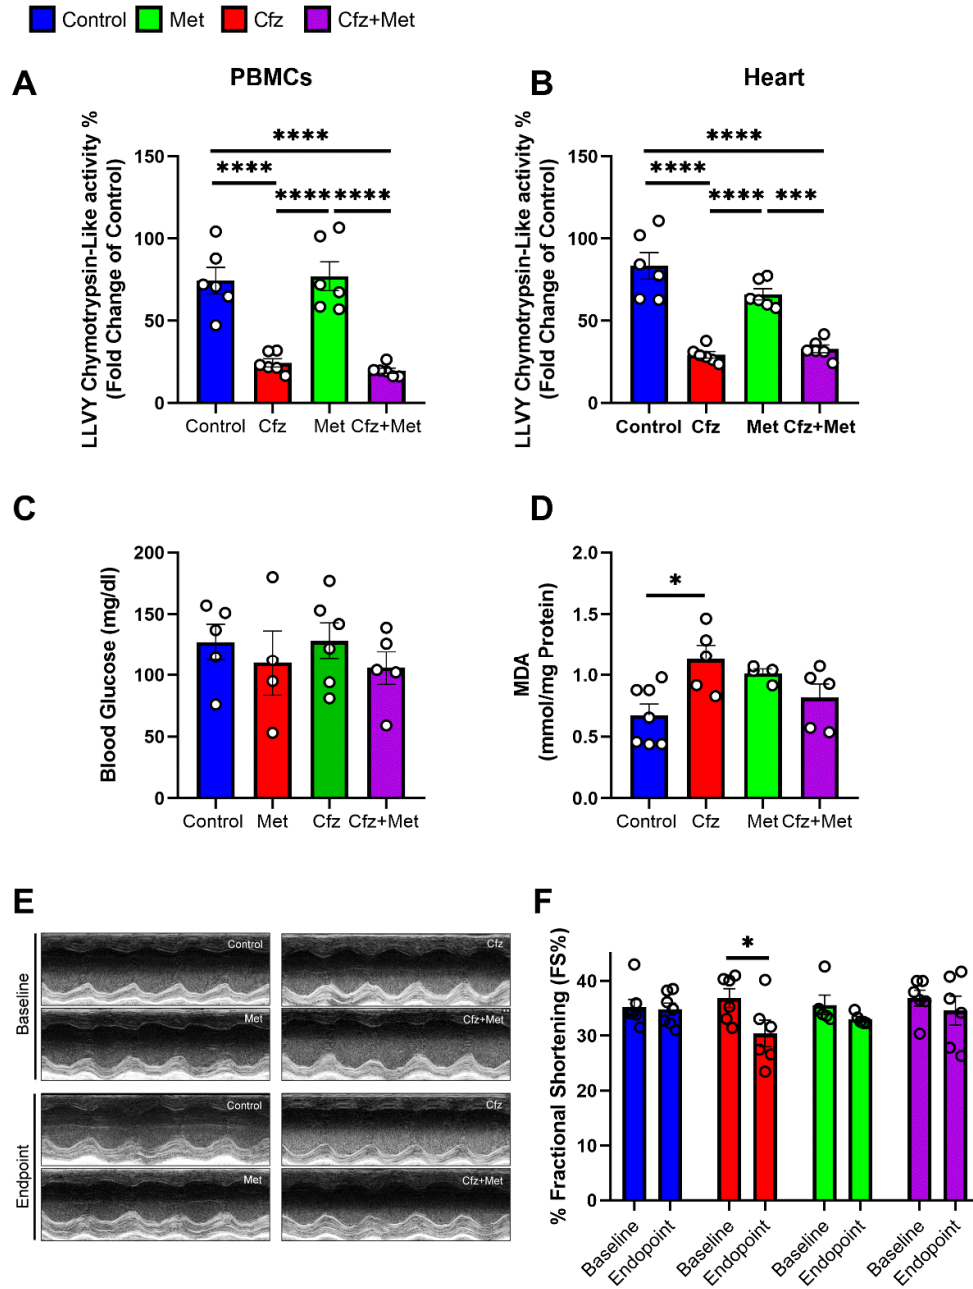

**Figure S2: Metformin in the two doses protocol can successfully mitigate the early mild cardiotoxic phenomena induced by Cfz.** Graphs of LLVY Chymotrypsin-Like activity % in the **A.** PBMCs and **B.** Heart expressed as Fold change of young adult (13 weeks of age) C57BL/6J mice after two doses of Cfz (n=6 per group). **C.** Fasting Blood glucose levels (mg/dl). **D.** Myocardial MDA content (in mmol/mg protein, n=4-7 per group). **E, F.** Representative M-Mode images and graph of Fractional Shortening (FS%) in the two doses protocol (n=5-7 per group). All data are presented as mean  $\pm$  SEM. One-way ANOVA, Tukey's post-hoc test, \*P<0.05, \*\*\*P<0.005, \*\*\*\*P<0.001.

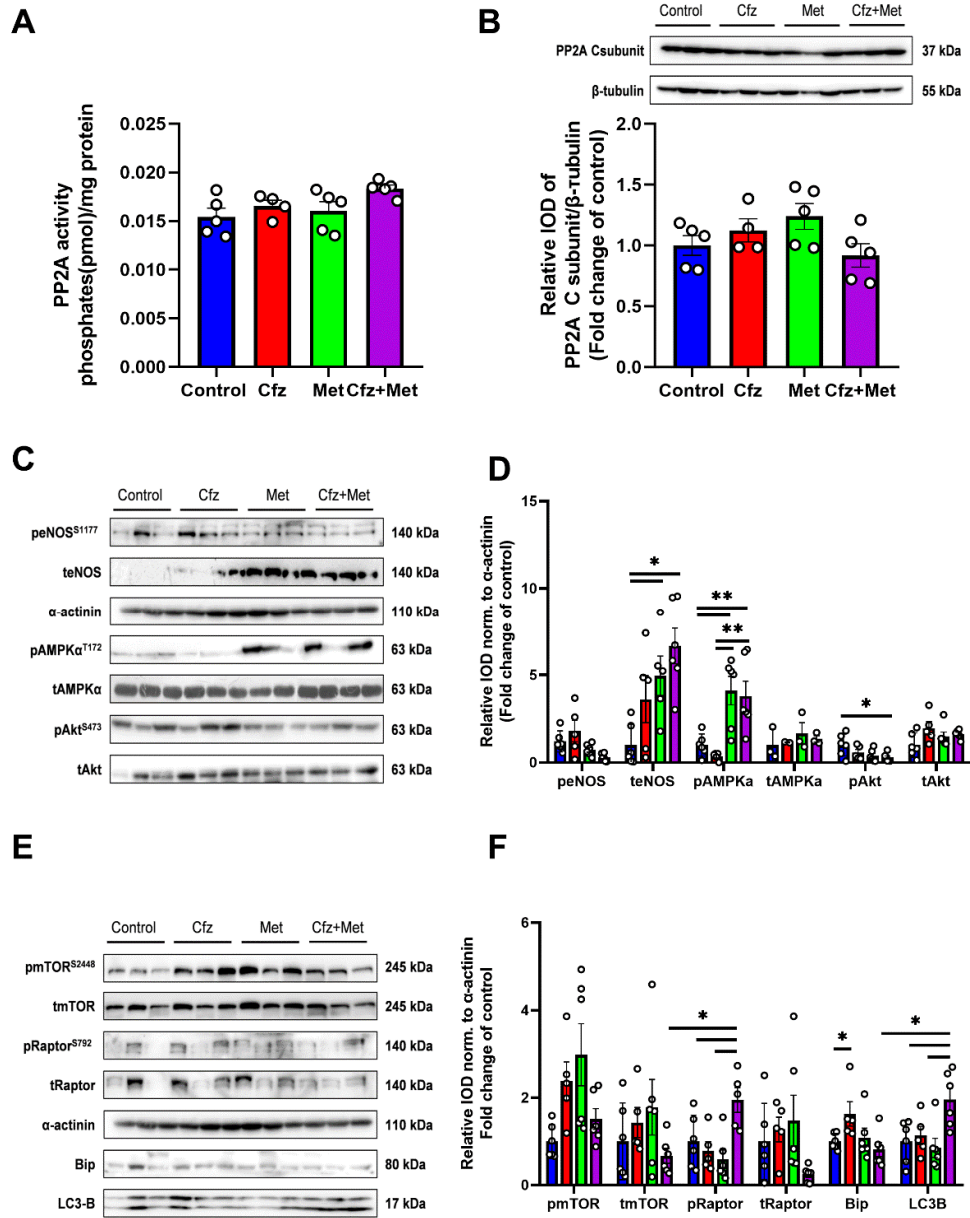

**Figure S3: Metformin protects against early Cfx cardiotoxicity through AMPK $\alpha$  phosphorylation, restoration of Bip expression and synergistic induction of LC3B-dependent autophagy.** Graphs of PP2A **A**. activity (in pmol/mg protein) and **B**. expression (fold change of control) (n=5 per group). **C**. Representative western blots and **D**. Relative densitometry analysis of phosphorylated and total eNOS, AMPK $\alpha$  and Akt levels normalized to  $\alpha$ -actinin. **E**. Representative Western blots and **F**. Relative densitometry analysis of phosphorylated and total mTOR, Raptor and total Bip and LC3B normalized to  $\alpha$ -actinin (n=5-6 per group). All data are presented as mean  $\pm$  SEM. One-way ANOVA, Tukey's post-hoc test, \*P<0.05, \*\*P<0.01.

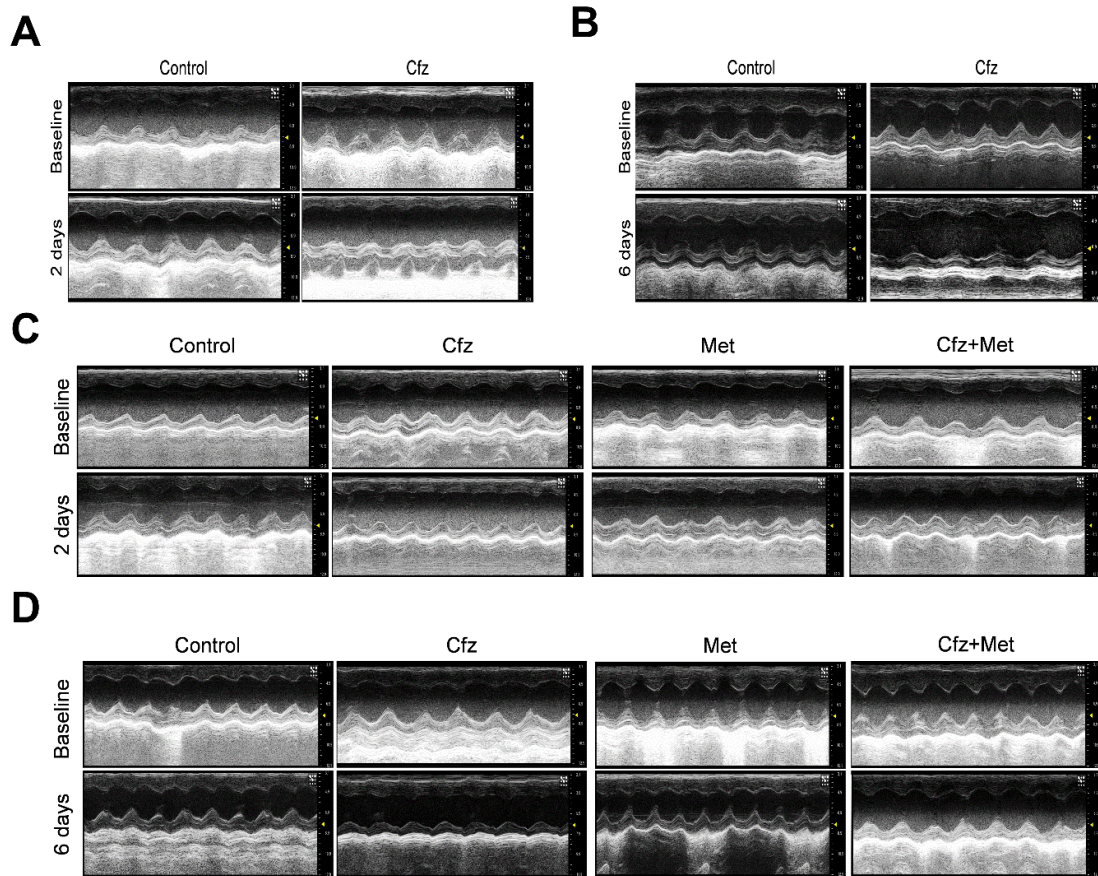

**Figure S4: Panel of original echocardiography images.** Panel of original echocardiography images including the scale bar corresponding to A-B. Figure 1 C. Figure S1 and D. Figure 4.

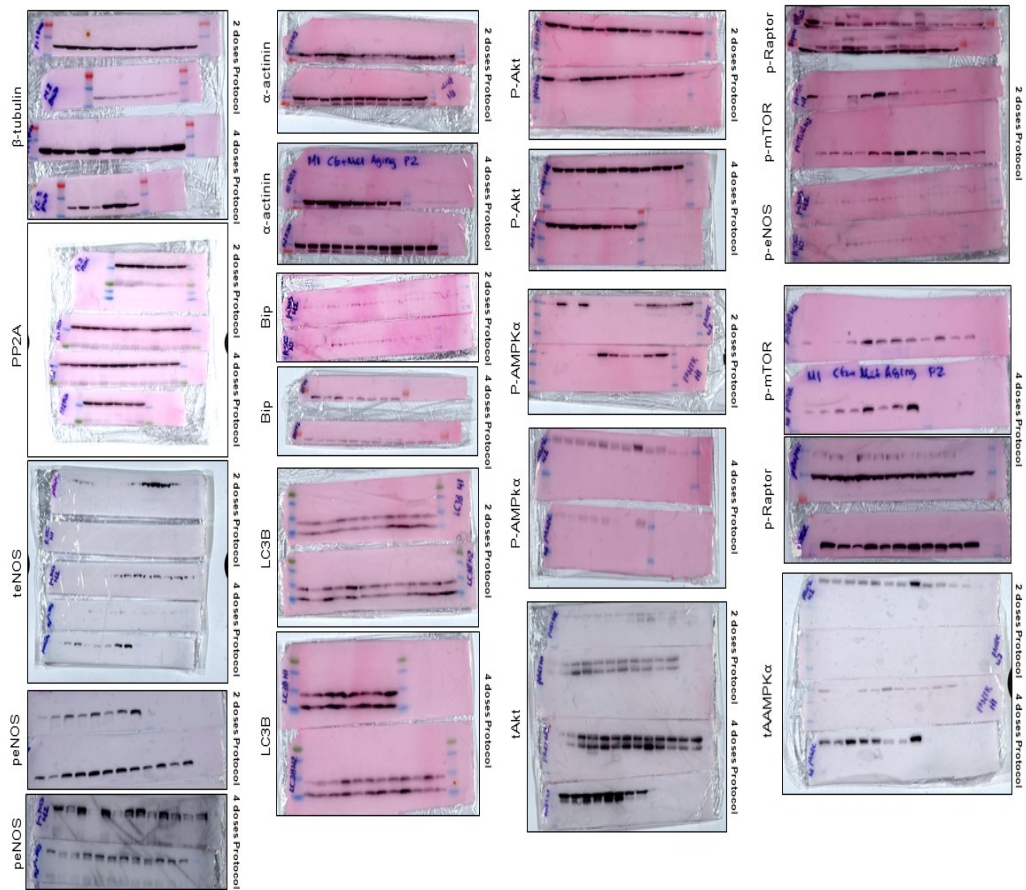

**Figure S5: Panel of original western blots.** Panel of original western blot images of 2 doses and 4 doses protocols.
